# Supplementary material for: Impulsivity Traits in Parkinson's Disease: A Systematic Review and Meta‐Analysis
Source: PubMed Central journal article supplement (PMC10585972; doi:10.1002/mdc3.13839), 2023-07-26

**Figure S1.** BIS-11 subscale (attentional, motor, and non-planning impulsivity) scores: PD vs healthy controls

### Attentional impulsivity subscale

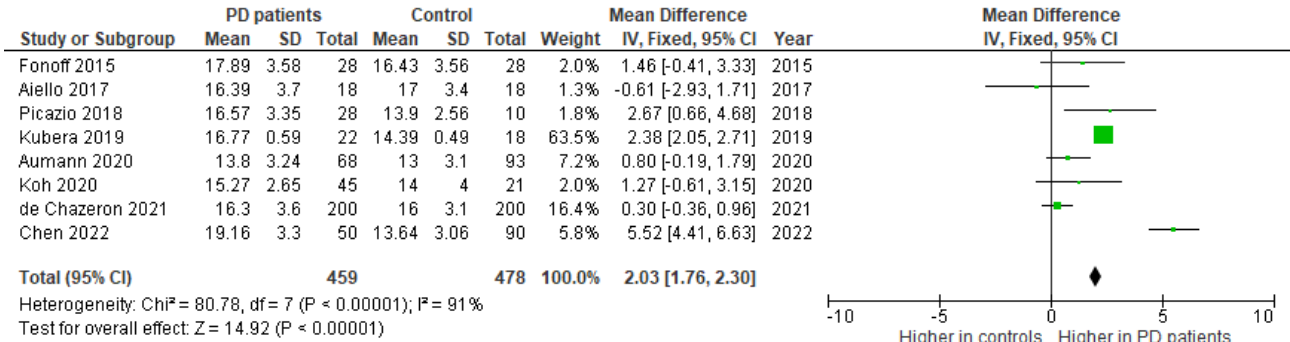

### Motor impulsivity subscale

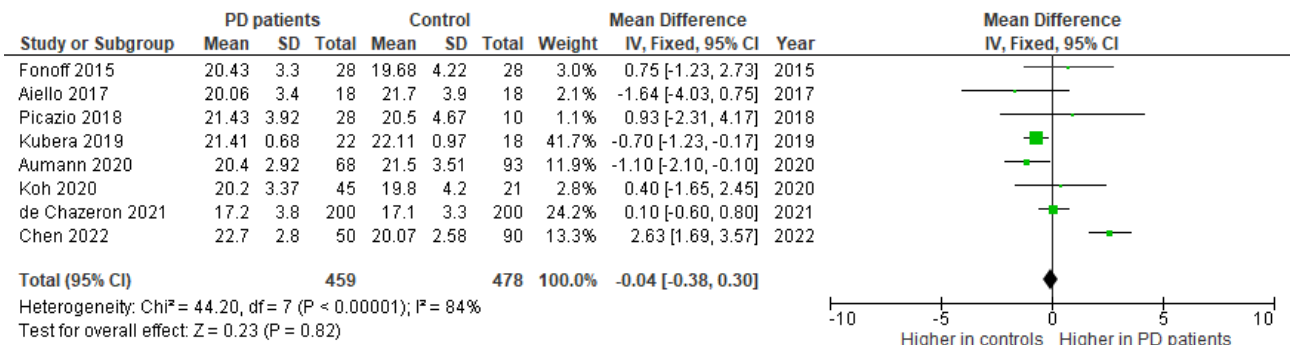

### Non-planning impulsivity subscale

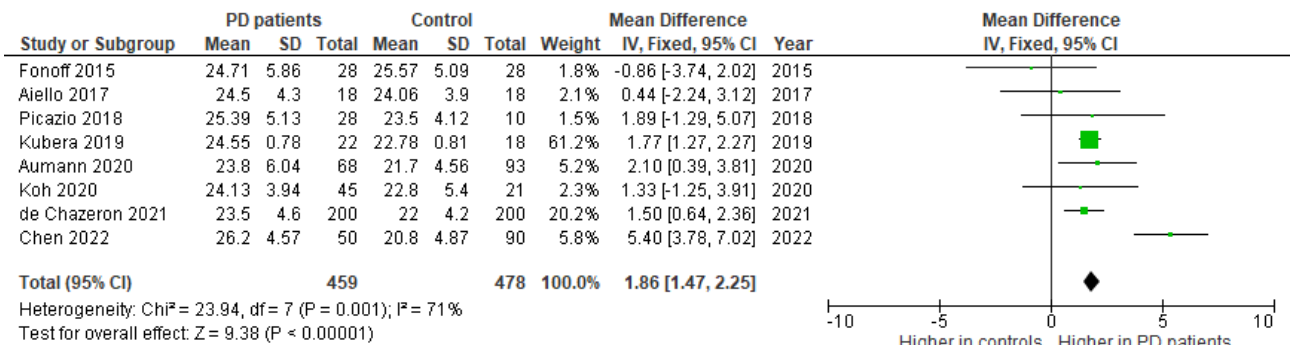

Supplement: MDC3-10-1448-s002.pdf [file MDC3-10-1448-s002.pdf]
